1 July 29, 2021

*Microbiology Resource Announcements* (in press)

2  
3  
4 **Genome assemblies across the diverse evolutionary spectrum**  
5 **of *Leishmania* protozoan parasites**

6  
7 Wesley C. Warren<sup>1</sup>, Natalia S. Akopyants<sup>2</sup>, Deborah E. Dobson<sup>2</sup>, Christiane Hertz-Fowler<sup>3</sup>,  
8 Lon-Fye Lye<sup>2</sup>, Peter J. Myler<sup>4,5</sup>, Gowthaman Ramasamy<sup>4</sup>, Achchuthan Shanmugasundram<sup>3</sup>,  
9 Fatima Silva-Franco<sup>3</sup>, Sascha Steinbiss<sup>6</sup>, Chad Tomlinson<sup>7</sup>, Richard K. Wilson<sup>8</sup>,  
10 and Stephen M. Beverley<sup>2,\*</sup>

11  
12 <sup>1</sup> Department of Animal Sciences, Institute of Data Science and Informatics, Bond Life Sciences  
13 Center, University of Missouri, Columbia, MO, USA.

14 <sup>2</sup> Department of Molecular Microbiology, Washington University School of Medicine, St Louis,  
15 MO; Washington University School of Medicine, St Louis, MO.

16 <sup>3</sup> Institute of Integrative Biology, Biosciences Building, University of Liverpool, Crown Street,  
17 Liverpool L69 7ZB, UK.

18 <sup>4</sup> Center for Global Infectious Disease Research, Seattle Children's Research Institute, Seattle,  
19 WA, USA.

20 <sup>5</sup> Department of Pediatrics, Department of Biomedical Informatics and Medical Education and  
21 Department of Global Health, University of Washington, Seattle WA, USA

22 <sup>6</sup> Wellcome Sanger Institute, Hinxton, Cambridgeshire, UK, CB10 1SA

23 <sup>7</sup> McDonnell Genome Institute, Washington University School of Medicine, St Louis, MO; USA

24 <sup>8</sup> The Steve and Cindy Rasmussen Institute for Genomic Medicine, Nationwide Children's  
25 Hospital, Columbus, Ohio, USA.

26  
27 \*Corresponding author: Stephen M. Beverley, Molecular Microbiology, Washington University  
28 School of Medicine, St Louis, MO 63110, USA. Telephone 1-314-747-2630; email  
29 [stephen.beverley@wustl.edu](mailto:stephen.beverley@wustl.edu).

30  
31 **Keywords:** *Leishmania*, *Viannia*, *Mundinia*, comparative genomics, evolution of parasitism,  
32 Kinetoplastida, Trypanosomatidae.

33  
34 Running title: Genome assemblies across *Leishmania* phylogeny  
35

36 **Abstract**

37

38 **We report high-quality draft assemblies and gene annotation for 13 species and/or strains of**  
39 **the protozoan parasite genera *Leishmania*, *Endotrypanum* and *Crithidia*, which span the**  
40 **phylogenetic diversity of the Leishmaniinae sub-family within the kinetoplastid order of the**  
41 **phylum Euglenozoa. These resources will support studies on the origins of parasitism.**

42

43 *Leishmania* species are widespread parasites of mammals transmitted by biting insects.  
44 Over 1.7 billion people worldwide are at risk, with hundreds of millions of people infected (1-4).  
45 The genus comprises more than 50 species, which are primarily zoonotic but in humans cause  
46 disease ranging from mild cutaneous lesions to more disseminated forms, to fatal visceralizing  
47 disease (5). While parasitism by *Leishmania* has been intensively studied, the species-specific  
48 factors that enable mammalian or insect host infections are less well understood. To provide a  
49 broad phylogenetic snapshot, we selected a spectrum of species and strains across the  
50 Leishmaniinae sub-family (5), targeting lineages within the subgenera *Leishmania*, *Viannia*, and  
51 *Mundinia*, as well as allied *Endotrypanum* and the outgroup *Crithidia fasciculata* (Table 1).

52 Parasites were cultivated in M199 or Schneider's medium (6) and grown to late log  
53 phase, before harvesting, lysis, and DNA purification by phenol/chloroform extraction and/or  
54 banding in CsCl gradients (to remove mitochondrial maxi- or minicircle DNA). Sequencing  
55 libraries were generated using the Illumina paired-end DNA sample preparation kit (PE-102-  
56 1001) according to the manufacturer's directions. Fragment libraries of 3 and 8kb were prepared  
57 using protocols for 454 sequencing (Roche Life Sciences). Sequencing was performed on either a  
58 454 GS FLX Titanium (average read length of 305bp; Roche 454 Life Sciences), or Illumina  
59 GAIIX and HiSeq2000 instruments (paired end 100bp read length), except for *Crithidia* which  
60 additionally utilized long-reads generated on a RSII instrument (P5/C3 chemistry; Pacific  
61 BioSciences) (7). Total sequence genome coverage on the Illumina GAIIX or HiSeq 2000  
62 instrument was on average 105x with tiered library insert sizes (50x fragments, 45x 3kb, and 10x  
63 8kb and 0.05x 40kb). For all Illumina sequences we used the read processing steps within the  
64 ALLPATHS-LG (8) software prior to *de novo* assembly, which incorporates read error correction  
65 methods described by Pevzner *et al* (9). Genome assemblies were performed with default  
66 parameters using Newbler v2.0.1 (10) for 454 reads, ALLPATHS-LG (8) for Illumina reads, or  
67 HGAP version 3 (11) for long-reads (Table 1). Contigs and scaffolds were organized into  
68 pseudochromosomes using ABACAS2 (<https://github.com/satta/ABACAS2>), a successor to  
69 ABACAS (12), by alignment to the *Leishmania major* Friedlin genome, with the exception of *L.*

70 *braziliensis* M2903 and *L. panamensis*, which were aligned to the *L. braziliensis* M2904 genome.  
71 The estimated haploid genome sizes ranged from 30.4 to 41.3 megabases (13).

72 Gene annotations were performed using the comprehensive Companion tool which  
73 incorporates a variety of *de novo* prediction criteria, as well as information from closely related  
74 genomes when available (14). The number of protein-coding genes predicted ranged from 8,285  
75 to 9,619, typical of other *Leishmania* (13). Full annotations, as well as a variety of tools for the  
76 visualization or analysis of these genomes, are available from TriTrypDB ([www.tritrypdb.org](http://www.tritrypdb.org)).

77  
78 **Public availability and accession number(s).** Assemblies are deposited in the NCBI GenBank  
79 Repository under the Bioproject numbers in Table 1, including links to the primary data and  
80 annotations ([PRJNA50303](https://ncbi.nlm.nih.gov/bioproject/50303), [PRJNA50301](https://ncbi.nlm.nih.gov/bioproject/50301), [PRJNA192717](https://ncbi.nlm.nih.gov/bioproject/192717), [PRJNA192712](https://ncbi.nlm.nih.gov/bioproject/192712), [PRJNA192710](https://ncbi.nlm.nih.gov/bioproject/192710),  
81 [PRJNA169676](https://ncbi.nlm.nih.gov/bioproject/169676), [PRJNA169673](https://ncbi.nlm.nih.gov/bioproject/169673), [PRJNA165955](https://ncbi.nlm.nih.gov/bioproject/165955), [PRJNA165959](https://ncbi.nlm.nih.gov/bioproject/165959), [PRJNA192711](https://ncbi.nlm.nih.gov/bioproject/192711), [PRJNA192703](https://ncbi.nlm.nih.gov/bioproject/192703),  
82 [PRJNA165953](https://ncbi.nlm.nih.gov/bioproject/165953), [PRJNA165885](https://ncbi.nlm.nih.gov/bioproject/165885)). Chromosome builds are available through the TriTrypDB  
83 portal (<http://tritrypdb.org/tritrypdb>).

84

#### 85 **Acknowledgements.**

86 NIH grant AI29646 to Stephen M. Beverley provided support for NSA, DED and L-FL, NIH-  
87 NHGRI grant HG00307907 to Richard K. Wilson supported WCW, and CT, and AI103858 to  
88 Peter J Myler supported GA. Funding to Christiane Hertz-Fowler from Wellcome Trust grants  
89 WT099198MA and WT108443MA provided support for FS-F, AS and SS. We thank Patrick  
90 Minx for assembly curation. We thank the colleagues listed in Table 1 for generously providing  
91 strains and Brian Brunk, David Roos, Thomas Otto and Matt Berriman for discussions. The WU  
92 Institutional Biosafety Committee reviewed and approved the parasite work reported here (01-  
93 015).

94

95 **References.**

- 96
- 97 1. Pigott DM, Bhatt S, Golding N, Duda KA, Battle KE, Brady OJ, Messina JP, Balard  
98 Y, Bastien P, Pratlong F, Brownstein JS, Freifeld CC, Mekaru SR, Gething PW,  
99 George DB, Myers MF, Reithinger R, Hay SI. 2014. Global distribution maps of the  
100 leishmaniases. *Elife* 3:e28051.
- 101 2. Alvar J, Velez ID, Bern C, Herrero M, Desjeux P, Cano J, Jannin J, den Boer M.  
102 2012. Leishmaniasis worldwide and global estimates of its incidence. *PLoS One*  
103 7:e35671.
- 104 3. Banuls AL, Bastien P, Pomares C, Arevalo J, Fisa R, Hide M. 2011. Clinical  
105 pleiomorphism in human leishmaniases, with special mention of asymptomatic  
106 infection. *Clin Microbiol Infect* 17:1451-61.
- 107 4. Singh OP, Hasker E, Sacks D, Boelaert M, Sundar S. 2014. Asymptomatic  
108 Leishmania infection: a new challenge for *Leishmania* control. *Clin Infect Dis*  
109 58:1424-9.
- 110 5. Espinosa OA, Serrano MG, Camargo EP, Teixeira MMG, Shaw JJ. 2018. An  
111 appraisal of the taxonomy and nomenclature of trypanosomatids presently classified  
112 as *Leishmania* and *Endotrypanum*. *Parasitology* 145:430-442.
- 113 6. Lye LF, Owens K, Shi H, Murta SM, Vieira AC, Turco SJ, Tschudi C, Ullu E,  
114 Beverley SM. 2010. Retention and loss of RNA interference pathways in  
115 trypanosomatid protozoans. *PLoS Pathog* 6:e1001161.
- 116 7. Filosa JN, Berry CT, Ruthel G, Beverley SM, Warren WC, Tomlinson C, Myler PJ,  
117 Dudkin EA, Povelones ML, Povelones M. 2019. Dramatic changes in gene  
118 expression in different forms of *Crithidia fasciculata* reveal potential mechanisms  
119 for insect-specific adhesion in kinetoplastid parasites. *PLoS Negl Trop Dis*  
120 13:e0007570.
- 121 8. Gnerre S, Maccallum I, Przybylski D, Ribeiro FJ, Burton JN, Walker BJ, Sharpe T,  
122 Hall G, Shea TP, Sykes S, Berlin AM, Aird D, Costello M, Daza R, Williams L,  
123 Nicol R, Gnirke A, Nusbaum C, Lander ES, Jaffe DB. 2011. High-quality draft

- 124 assemblies of mammalian genomes from massively parallel sequence data. Proc Natl  
125 Acad Sci U S A 108:1513-8.
- 126 9. Pevzner PA, Tang H, Waterman MS. 2001. An Eulerian path approach to DNA  
127 fragment assembly. Proc Natl Acad Sci U S A 98:9748-53.
- 128 10. Margulies M, Egholm M, Altman WE, Attiya S, Bader JS, Bemben LA, Berka J,  
129 Braverman MS, Chen YJ, Chen Z, Dewell SB, Du L, Fierro JM, Gomes XV,  
130 Godwin BC, He W, Helgesen S, Ho CH, Irzyk GP, Jando SC, Alenquer ML, Jarvie  
131 TP, Jirage KB, Kim JB, Knight JR, Lanza JR, Leamon JH, Lefkowitz SM, Lei M, Li  
132 J, Lohman KL, Lu H, Makhijani VB, McDade KE, McKenna MP, Myers EW,  
133 Nickerson E, Nobile JR, Plant R, Puc BP, Ronan MT, Roth GT, Sarkis GJ, Simons  
134 JF, Simpson JW, Srinivasan M, Tartaro KR, Tomasz A, Vogt KA, Volkmer GA, et  
135 al. 2005. Genome sequencing in microfabricated high-density picolitre reactors.  
136 Nature 437:376-80.
- 137 11. Chaisson MJ, Huddleston J, Dennis MY, Sudmant PH, Malig M, Hormozdiari F,  
138 Antonacci F, Surti U, Sandstrom R, Boitano M, Landolin JM, Stamatoyannopoulos  
139 JA, Hunkapiller MW, Korlach J, Eichler EE. 2015. Resolving the complexity of the  
140 human genome using single-molecule sequencing. Nature 517:608-11.
- 141 12. Assefa S, Keane TM, Otto TD, Newbold C, Berriman M. 2009. ABACAS:  
142 algorithm-based automatic contiguation of assembled sequences. Bioinformatics  
143 25:1968-9.
- 144 13. Ivens AC, Peacock CS, Worthey EA, Murphy L, Aggarwal G, Berriman M, Sisk E,  
145 Rajandream MA, Adlem E, Aert R, Anupama A, Apostolou Z, Attipoe P, Bason N,  
146 Bauser C, Beck A, Beverley SM, Bianchetti G, Borzym K, Bothe G, Bruschi CV,  
147 Collins M, Cadag E, Ciarloni L, Clayton C, Coulson RM, Cronin A, Cruz AK,  
148 Davies RM, De Gaudenzi J, Dobson DE, Duesterhoeft A, Fazelina G, Fosker N,  
149 Frasc AC, Fraser A, Fuchs M, Gabel C, Goble A, Goffeau A, Harris D, Hertz-  
150 Fowler C, Hilbert H, Horn D, Huang Y, Klages S, Knights A, Kube M, Larke N,  
151 Litvin L, et al. 2005. The genome of the kinetoplastid parasite, *Leishmania major*.  
152 Science 309:436-42.

- 153 14. Steinbiss S, Silva-Franco F, Brunk B, Foth B, Hertz-Fowler C, Berriman M, Otto  
154 TD. 2016. Companion: a web server for annotation and analysis of parasite  
155 genomes. *Nucleic Acids Res* 44:W29-34.

156

157

158

159

**Table 1. Description of *Leishmania* species and strains including assembly parameters and links.**

| Subgenus             | Species                         | strain ID         | WHO Code                   | Source                            | Provenance                                 | NCBI GenBank Bioproject <sup>1</sup> | Sequencing Platforms  | Assembler | Contigs | N50 contig length | Assembly size (bp) | %GC  | Pseudo-chromosomes | Protein coding genes | Other assemblies |
|----------------------|---------------------------------|-------------------|----------------------------|-----------------------------------|--------------------------------------------|--------------------------------------|-----------------------|-----------|---------|-------------------|--------------------|------|--------------------|----------------------|------------------|
| <i>L. Leishmania</i> | <i>L. major</i>                 | SD75.1 (clone)    | MHOM/SN/74/SD              | human, cutaneous                  | D. Sacks, Bethesda USA                     | <a href="#">PRJNA50303</a>           | 454, Illumina         | Newbler   | 891     | 95,380            | 31,727,271         | 59.3 | 36                 | 8,818                |                  |
|                      |                                 | LV39 (clone5)     | MHOM/Sv/59/P               | human, cutaneous                  | R. Titus, Boston, USA                      | <a href="#">PRJNA50301</a>           | 454, Illumina         | Newbler   | 1,667   | 71,452            | 31,961,985         | 59.5 | 36                 | 8,971                |                  |
|                      | <i>L. gerbilli</i>              | LEM452            | MRHO/CN/60/GERBILLI        | gerbil                            | P. Bastien, J-P Dedet, Montpellier, France | <a href="#">PRJNA192717</a>          | 454, Illumina         | Allpaths  | 1,248   | 57,008            | 30,822,621         | 59.6 | 36                 | 8,599                |                  |
|                      | <i>L. turanica</i>              | LEM563            | MMEL/SU/79/MEL             | gerbil                            | P. Bastien, J-P Dedet, Montpellier, France | <a href="#">PRJNA192712</a>          | 454, Illumina         | Allpaths  | 1,669   | 39,210            | 30,876,294         | 59.5 | 36                 | 8,608                |                  |
|                      | <i>L. arabica</i>               | LEM1108           | MPSA/SA/83/JISH220         | <i>Psammomys</i> human, cutaneous | P. Bastien, J-P Dedet, Montpellier, France | <a href="#">PRJNA192710</a>          | 454, Illumina         | Allpaths  | 1,530   | 52,119            | 30,774,332         | 59.2 | 36                 | 8,646                |                  |
| <i>L. tropica</i>    | L590                            | MHOM/IL/1990/P283 | human, diffuse cutaneous   | C. Jaffe, Jerusalem, Israel       | <a href="#">PRJNA169676</a>                | 454, Illumina                        | Allpaths              | 1,938     | 32,739  | 31,326,083        | 59.6               | 36   | 8,824              | (12)                 |                  |
| <i>L. aethiopica</i> | L147                            | MHOM/ET/1972/L100 | relapsing cutaneous, human | C. Jaffe, Jerusalem, Israel       | <a href="#">PRJNA169673</a>                | 454, Illumina                        | Allpaths              | 1,758     | 38,498  | 31,026,739        | 60.1               | 36   | 8,722              |                      |                  |
| <i>L. Viannia</i>    | <i>L. braziliensis</i>          | M2903             | MHOM/BR/72/M2903           | human, cutaneous                  | J. Shaw, Brasil                            | <a href="#">PRJNA165955</a>          | 454, Illumina         | Newbler   | 3,934   | 61,918            | 32,590,753         | 57.4 | 35                 | 9,269                |                  |
|                      | <i>L. panamensis</i>            | L13               | MHOM/COL/81/L13            | human, mucosal                    | N. Saravia, Cali, Colombia                 | <a href="#">PRJNA165959</a>          | 454, Illumina         | Allpaths  | 3,163   | 22,576            | 31,108,242         | 57.4 | 35                 | 8,665                |                  |
| <i>L. Mundinia</i>   | <i>L. enriettii</i>             | LEM3045           | MCAV/BR/95/CUR3            | <i>Cavia porcellus</i> guinea pig | P. Bastien, J-P Dedet, Montpellier, France | <a href="#">PRJNA192711</a>          | 454, Illumina         | Allpaths  | 1,171   | 102,666           | 30,427,298         | 59.3 | 36                 | 8,731                | (14)             |
|                      | <i>L. martiniquensis</i>        | LEM2494           | MHOM/MQ/92/MAR1            | human, diffuse cutaneous, HIV     | P. Bastien, J-P Dedet, Montpellier, France | <a href="#">PRJNA192703</a>          | 454, Illumina         | Allpaths  | 628     | 147,290           | 30,528,357         | 59.6 | 36                 | 8,483                | (14)             |
| <i>Endotrypanum</i>  | <i>Endotrypanum monterogeii</i> | LV88              | none                       | <i>Chaloepeus hoffmani</i> sloth  | Michael Chance, Liverpool UK               | <a href="#">PRJNA165953</a>          | 454, Illumina         | Newbler   | 3,517   | 33,059            | 32,086,870         | 52.5 | 36                 | 8,285                | (13)             |
| <i>Crithidia</i>     | <i>Crithidia fasciculata</i>    | Cf-C1 (clone)     | none                       | mosquito                          | Larry Simpson, Los Angeles, USA            | <a href="#">PRJNA165885</a>          | 454, Illumina, PacBio | HGAP      | 494     | 778,443           | 41,297,378         | 57.0 | 30                 | 9,619                | (8)              |

**Footnote 1** Each bioproject link contains links to the current assembly, primary data sets, and other relevant information.
